# Supplementary material for: Preparation of waterborne functional polymers using a bifunctional coupler
Source: Royal Society of Chemistry journal article supplement (doi:10.1039/c3gc41406j), 2013-01-01

## Preparation of waterborne functional polymers using a bifunctional coupler

Subrata Chattopadhyay, Helmut Keul, Martin Moeller

### Experimental section:

**Materials:** Hexylamine (99%, Aldrich), decylamine (99%, Aldrich), epichlorohydrin (99%, Merck), piperazine (99+%, Aldrich), 1, 4-diaminobutane (99%, Aldrich), triethylamine (99%, VWR) were used as received. Salt free poly(vinyl amine) was obtained from BASF as aqueous solution. This aqueous solution was freeze dried and the solid poly(vinyl amine) was used as starting material. Distilled water was used as solvent for all the reactions.

### Measurements:

$^1\text{H}$  NMR and  $^{13}\text{C}$  NMR spectra were recorded on a Bruker DPX-400 FT-NMR spectrometer at 400 and 100 MHz, respectively. Deuterium oxide ( $\text{D}_2\text{O}$ ), deuterated methanol ( $\text{CD}_3\text{OD}$ ) and deuterated dimethyl sulfoxide ( $\text{DMSO-d}_6$ ) were used as solvents. Tetramethylsilane (TMS) was used as an internal standard. All Raman spectra were recorded on a Buker RFS100/s Raman spectrometer, fitted with a Nd: YAG laser (1064nm). The spectral resolution was  $4\text{ cm}^{-1}$ . For one spectrum 1000 scans were collected at a laser power of 200mW. Size exclusion chromatography analysis (SEC) were carried out with water (with addition of 0.1 M NaCl, 0.1% TFA, 0.01%  $\text{NaN}_3$ ) as eluting solvent at  $30^\circ\text{C}$  with a flow rate of 1 mL/ min using a high pressure liquid chromatography pump (Agilent 1100) and refractive index detector (Wyatt, Optilab DSP). Three columns with PSS Novema gel were applied. The length of each column was 300 mm, the diameter was 8 mm, the diameter of the gel particles were  $10\text{ }\mu\text{m}$  and the nominal pore widths were 30, 3000 and  $3000\text{ }\text{\AA}$ . Calibration was achieved using Pullulan standards.

## Synthesis:

### Preparation of the bifunctional coupler **3**:

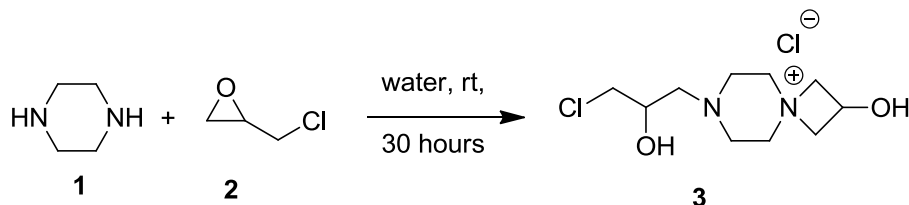

To a solution of piperazine (**1**) (3.3 g, 0.038 mol) in water (25 mL), epichlorohydrin (**2**) (6 mL, 0.076 mol) was added. The mixture was stirred for 2 days at 25°C. Then water was removed in vacuum. The bifunctional coupler **3** was obtained as a white solid (> 95% purity). Further purification was achieved by extracting the aqueous solution of the coupler with dichloromethane before removal of the water in vacuum.

Yield: > 95%

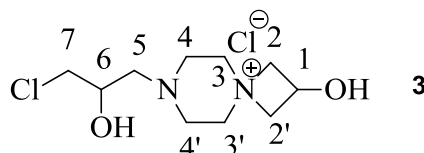

**<sup>1</sup>H NMR** (DMSO-*d*<sup>6</sup>, 400MHz):  $\delta$  = 6.70 & 5.36 (d, OH), 4.65 (m, H<sup>1</sup>), 4.49 & 4.17 (m, H<sup>2</sup>, H<sup>2'</sup>), 3.84 (m, H<sup>6</sup>), 3.7-3.4 (m, H<sup>3</sup>, H<sup>3'</sup>, H<sup>7</sup>), 2.8-2.4 (m, H<sup>4</sup>, H<sup>4'</sup>, H<sup>5</sup>) ppm. **<sup>13</sup>C NMR** (DMSO-*d*<sup>6</sup>, 100MHz):  $\delta$  = 70.25 (C<sup>2</sup>, C<sup>2'</sup>), 67.83 (C<sup>6</sup>), 60.58 (C<sup>3</sup>), 59.59 (C<sup>3'</sup>), 58.84 (C<sup>5</sup>), 57.72 (C<sup>1</sup>), 48.33 (C<sup>7</sup>), 47.88 (C<sup>4</sup>), 47.54 (C<sup>4'</sup>) ppm.

**Elemental analysis** (C<sub>10</sub>H<sub>20</sub>Cl<sub>2</sub>N<sub>2</sub>O<sub>2</sub>): calculated C: 44.29%, H: 7.43%, N: 10.33%, found: C: 44.15%, H: 7.82%, N: 10.35%

**Raman spectrum:** 750-650 cm<sup>-1</sup> (C-Cl bond)



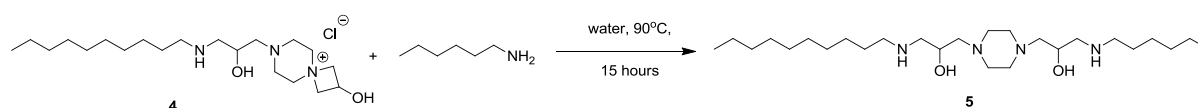

To a solution of functionalized coupler **4** (1.96 g, 5.00 mmol) in distilled water (5 mL), hexyl amine (0.506 g, 5.00 mmol) was added. The solution was stirred for 15 hours at 90°C and then cooled down to room temperature. Removal of water yielded the coupling product **5**.

Yield: > 90%

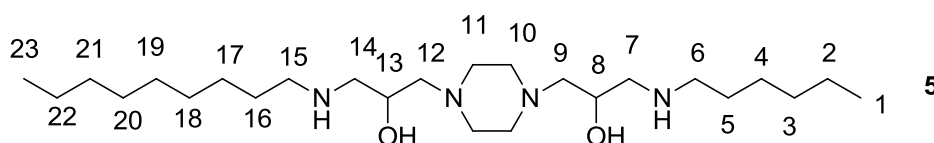

**<sup>1</sup>H NMR** (DMSO-*d*<sup>6</sup>, 400MHz):  $\delta$  = 3.9 (m, H<sup>8</sup>, H<sup>13</sup>), 3-2.4 (m, H<sup>6</sup>, H<sup>7</sup>, H<sup>9</sup>, H<sup>10</sup>, H<sup>11</sup>, H<sup>12</sup>, H<sup>14</sup>, H<sup>15</sup>), 1.8-1.2 (m, H<sup>2</sup>, H<sup>3</sup>, H<sup>4</sup>, H<sup>5</sup>, H<sup>16</sup>, H<sup>17</sup>, H<sup>18</sup>, H<sup>19</sup>, H<sup>20</sup>, H<sup>21</sup>), 0.856 (m, H<sup>1</sup>, H<sup>23</sup>) ppm.

**<sup>13</sup>C NMR** (DMSO-*d*<sup>6</sup>, 100MHz):  $\delta$  = 63.61 & 63.38 (C<sup>8</sup>, C<sup>13</sup>), 53.26 (C<sup>9</sup>, C<sup>12</sup>), 51.49 (C<sup>7</sup>, C<sup>14</sup>), 47.12 (C<sup>10</sup>, C<sup>11</sup>), 31.26 (C<sup>16</sup>), 30.7 (C<sup>5</sup>), 28.5-28.8 (C<sup>4</sup>, C<sup>17</sup>), 26.86 (C<sup>18</sup>), 26.02 (C<sup>19</sup>), 25.7 (C<sup>20</sup>), 25.49 (C<sup>21</sup>), 25.49 (C<sup>3</sup>), 22.069 (C<sup>22</sup>), 21.86 (C<sup>2</sup>), 13.93 (C<sup>23</sup>), 13.82 (C<sup>1</sup>) ppm.

**Reaction of the bifunctional coupler with 1, 4-diaminobutane 2:1 molar ratio (Selective conversion of one functional group of the coupler, preparation of compound 6):**

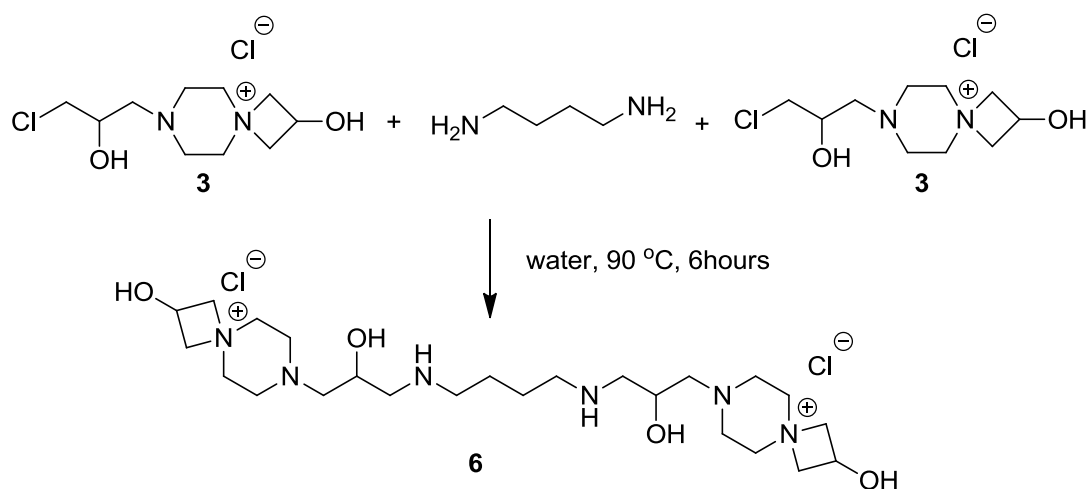

To a solution of coupler **3** (6.15 g, 22.68 mmol) in distilled water (24 mL), 1, 4-diaminobutane (1.0 g, 11.3 mmol) was added. The solution was stirred for 6 hours at 90°C and then cooled down to room temperature. Removal of water yielded the pure product **6**.

Yield: > 95%

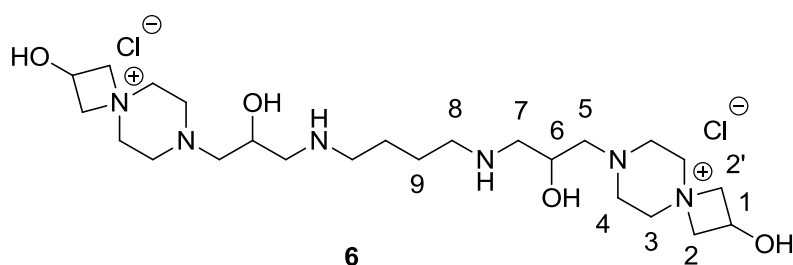

**<sup>1</sup>H NMR** (DMSO-d<sup>6</sup>, 400MHz): δ = 6.64 & 5.62 (OH), 4.66 (m, H<sup>1</sup>), 4.53 & 4.17 (m, H<sup>2</sup>, H<sup>2'</sup>), 3.7-3.4 (m, H<sup>3</sup>, H<sup>3'</sup>, H<sup>6</sup>), 2.8-2.4 (m, H<sup>4</sup>, H<sup>4'</sup>, H<sup>5</sup>, H<sup>7</sup>), 2.44 (m, H<sup>8</sup>), 1.7 (m, H<sup>9</sup>) ppm. **<sup>13</sup>C NMR** (DMSO-d<sup>6</sup>, 100MHz): δ = 70.36 (C<sup>2</sup>, C<sup>2'</sup>), 63.7 (C<sup>6</sup>), 60.59 (C<sup>3</sup>), 58.86 (C<sup>5</sup>), 57.72 (C<sup>1</sup>), 50.97 (C<sup>7</sup>), 47.85-47.35 (C<sup>4</sup>, C<sup>4'</sup>), 37.92 (C<sup>8</sup>), 23.84 (C<sup>9</sup>) ppm.

**Elemental analysis** (C<sub>24</sub>H<sub>50</sub>Cl<sub>2</sub>N<sub>6</sub>O<sub>4</sub>, 2HCl, 2½ H<sub>2</sub>O): calculated C: 42.67%, H: 8.5%, N: 12.44%, found: C: 42.99%, H: 8.9%, N: 12.15%

**Use of the bifunctional coupler as a monomer to prepare multifunctional polymers via condensation polymerization:**

## Preparation of copolymers containing secondary hydroxyl groups, secondary and tertiary amine groups in the backbone 7:

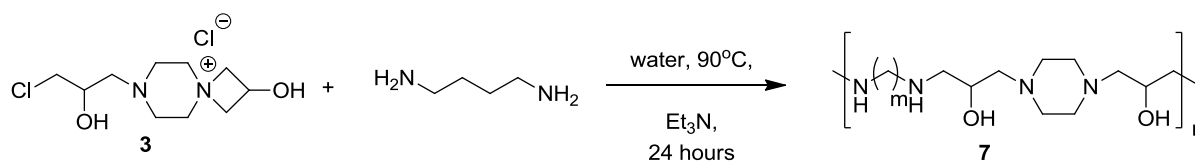

To a solution of bifunctional coupler **3** (1.49 g, 0.0055 mol) in distilled water (10 mL), 1,4-diaminobutane (0.487 g, 0.0055 mol) and triethylamine (0.55 g, 0.0055 mol) was added. The solution was allowed to stir for 24 hours at reflux and then cooled down to room temperature. The polymer **7** was purified by dialysis.

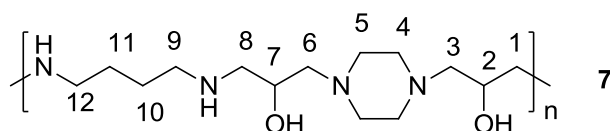

<sup>1</sup>H NMR (D<sub>2</sub>O, 400MHz): δ = 4.05 (H<sup>2</sup>, H<sup>7</sup>), 3.6-3.3 (H<sup>chain end</sup>), 3.1-2.2 (H<sup>1</sup>, H<sup>3</sup>, H<sup>4</sup>, H<sup>5</sup>, H<sup>6</sup>, H<sup>8</sup>, H<sup>9</sup>, H<sup>12</sup>), 1.8-1.4 (m, H<sup>10</sup>, H<sup>11</sup>) ppm.

**Elemental analysis:** Calculated considering one repeating unit as following

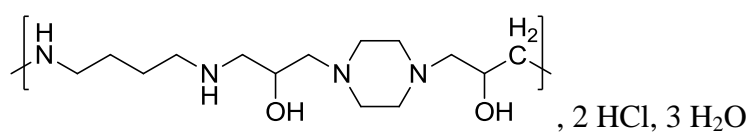

Calculated: C: 40.48%, H: 9.27%, N: 13.55%, found: C: 40.97%, H: 9.92%, N: 12.96%

**GPC analysis:**

M<sub>n</sub> = 1400, M<sub>w</sub> = 1600, PDI = 1.1

**Preparation of functional polymers:**

**Preparation of azetidinium functionalized poly(vinyl amine) **8** (procedure for 20% functionalization of the amine groups using the bifunctional coupler **3**):**

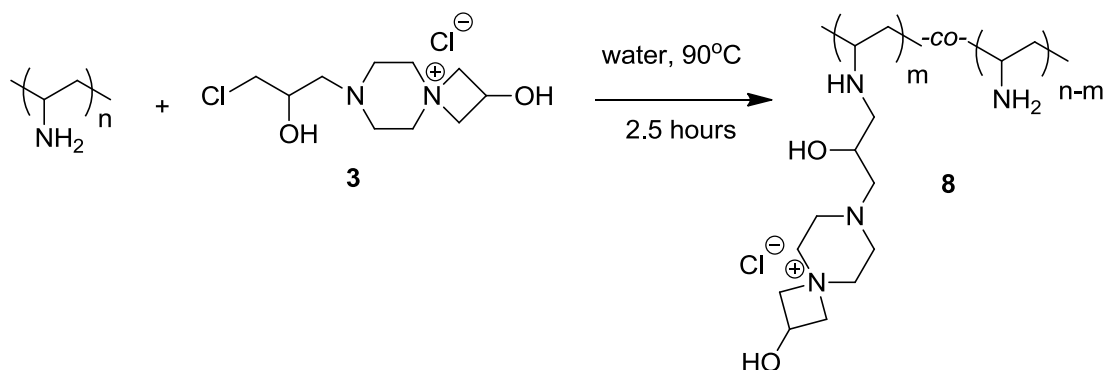

To a solution of poly(vinyl amine) (0.09 g, 0.00209 mol repeating unit) in distilled water (10 mL), the bifunctional coupler **3** (0.114 g, 0.00042 mol) was added. The solution was stirred for 2.5 hours at 90°C and then cooled down to room temperature.

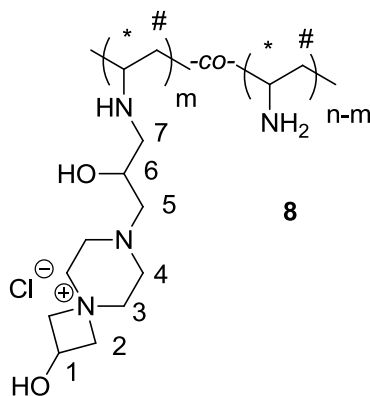

**<sup>1</sup>H NMR** (D<sub>2</sub>O, 400MHz):  $\delta$  = 4.74 (m, H<sup>1</sup>), 4.52 & 4.13 (m, H<sup>2</sup>, H<sup>2'</sup>), 3.84 (m, H<sup>6</sup>), 3.6-3.4 (m, H<sup>3</sup>), 3.2-3.0 (H<sup>7</sup>, H<sup>\*</sup>), 2.8-2.6 (m, H<sup>4</sup>, H<sup>5</sup>, H<sup>7</sup>), 1.7-1.3 (H<sup>#</sup>) ppm.

**Calculation for the degree of functionalization by <sup>1</sup>H NMR spectroscopy:**

The degree of functionalization was calculated from the integration related to the protons H<sup>2</sup> ( $\delta$  = 4.52 ppm) and the protons attached to the polymer backbone H<sup>#</sup> ( $\delta$  = 1.48 ppm)

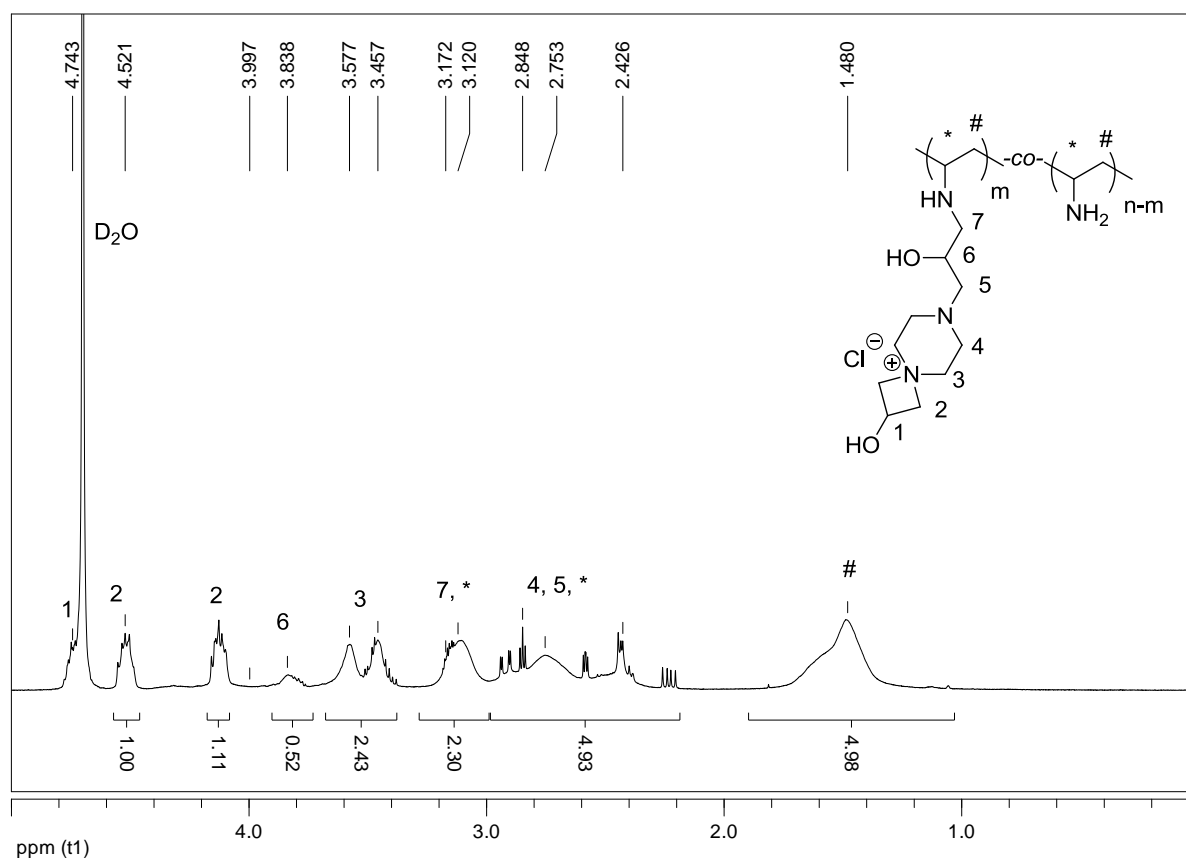

From the current NMR spectrum,  $I(H^2)/I(H^\#) = 4m/2n$

$$2m/n = I(H^2)/I(H^\#) = 2.11/4.98$$

$$m/n = 1.055/4.98$$

$m = 21.18\%$  of  $n$ , (The expected functionalization was 20%)

**Preparation of alkyl functionalized poly(vinyl amine) 9, (procedure for 20% functionalization of the amine groups using the functionalized coupler 4):**





**GPC analysis of the prepared PVAm polymers:** For GPC analysis the above described polymers were prepared using HPLC grade water using the above mentioned procedure. The results are given below:

| Polymer                                  | $M_n$              | $M_w$              | PDI  |
|------------------------------------------|--------------------|--------------------|------|
| Poly(vinyl amine) (PVAm)                 | $3.60 \times 10^5$ | $7.45 \times 10^5$ | 2.07 |
| Azetidinium functionalized PVAm <b>8</b> | $3.63 \times 10^5$ | $1.03 \times 10^6$ | 2.83 |

**Figure SI 1:**  $^1\text{H}$  NMR analysis for model reactions ( $\text{DMSO}-d^6$ ):

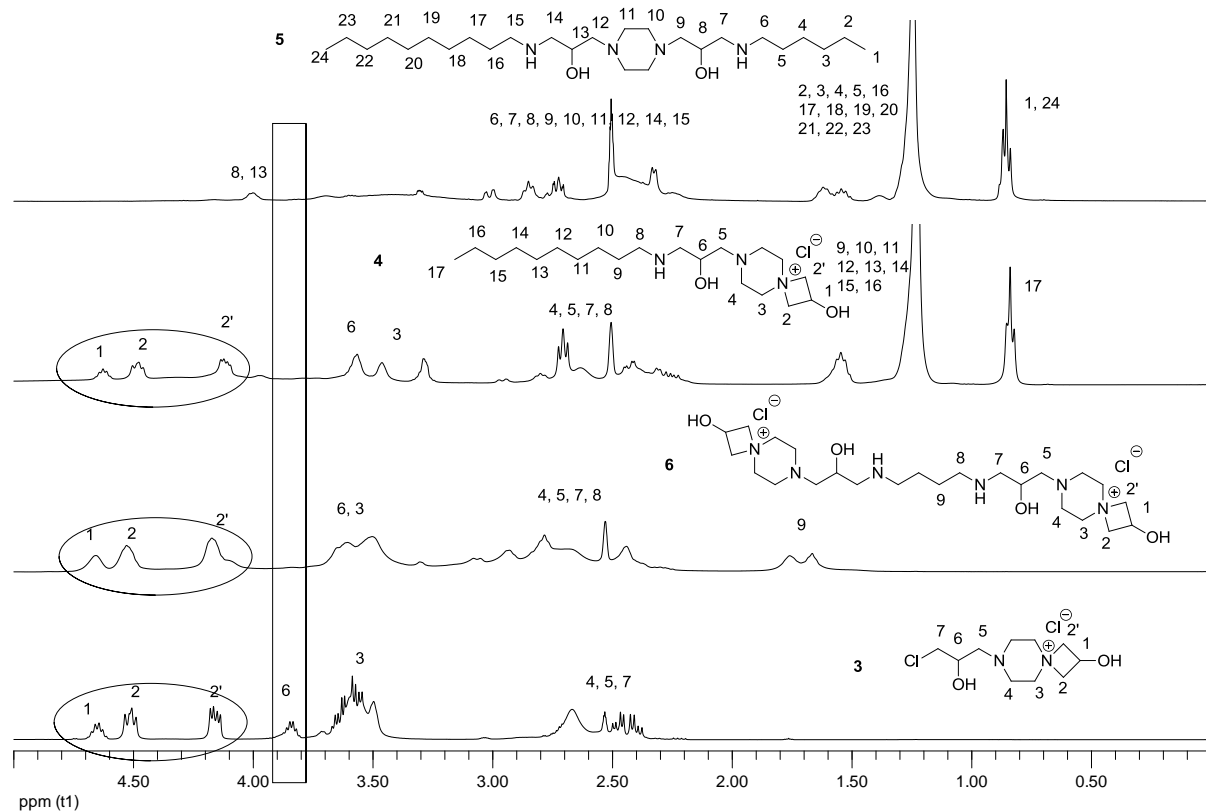

Proposed mechanism for the reaction of the bifunctional coupler with primary amines:

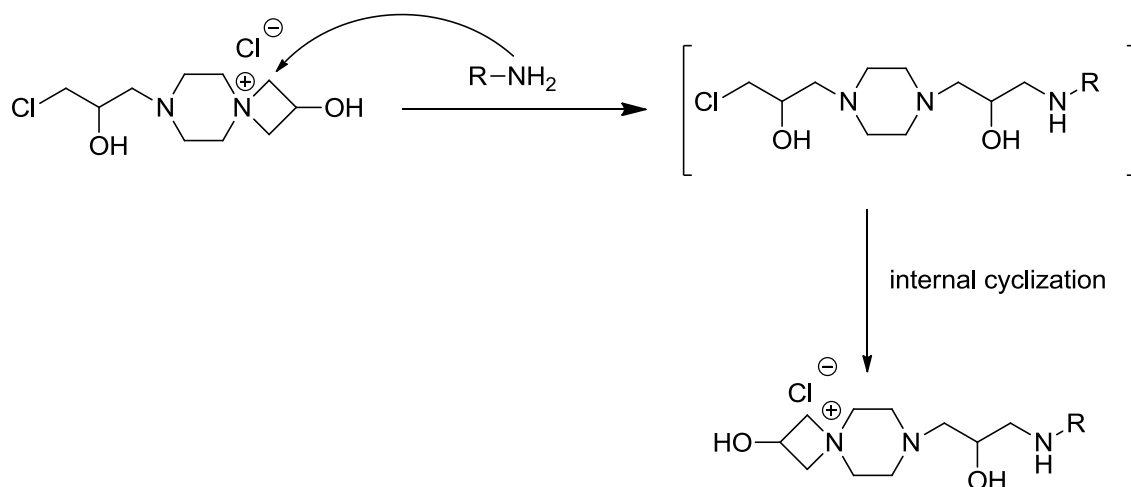

Network formed by crosslinking during prolonged heating of azetidinium functionalized

PVAm **8** :

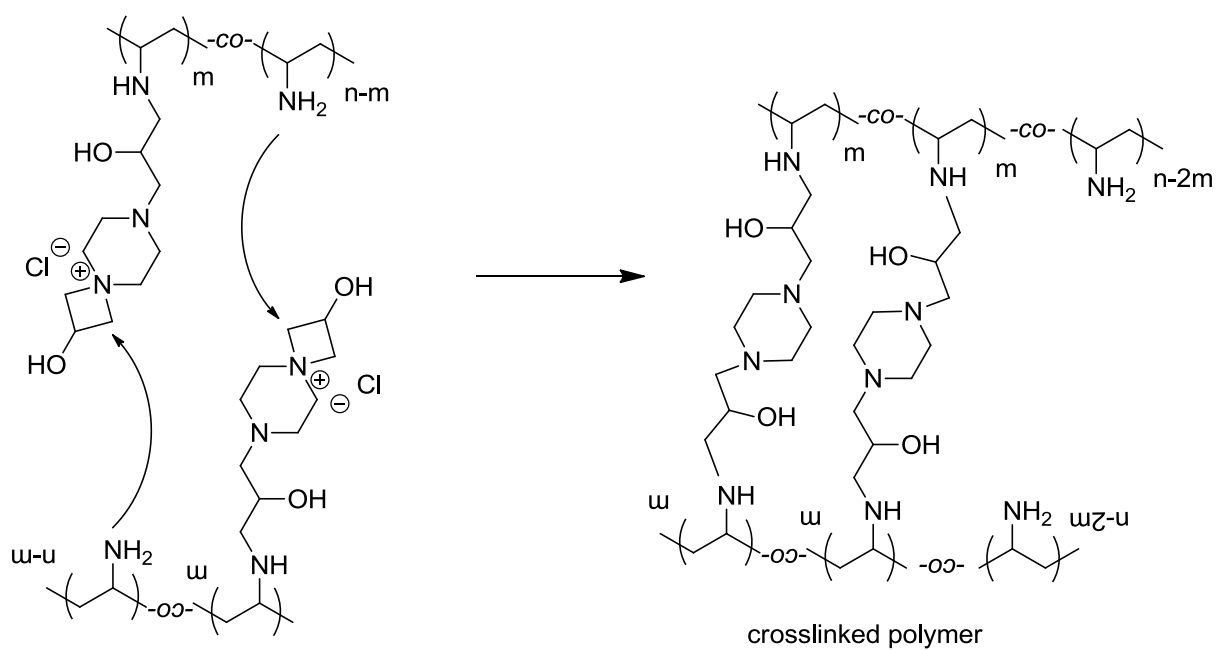

Supplement: c3gc41406j.pdf [file c3gc41406j.pdf]
